# Supplementary material for: Enhanced Performance of Carbon Molecular Sieve Membranes Incorporating Zeolite Nanocrystals for Air Separation
Source: MDPI journal article supplement (doi:10.3390/membranes11070489), 2021-06-29
Supplement: s1 [file s1]

# Supplementary Materials: Enhanced Performance of Carbon Molecular Sieve Membranes Incorporating Zeolite Nanocrystals for Air Separation

Chong Yang Chuah <sup>1</sup>, Kunli Goh <sup>1</sup> and Tae-Hyun Bae <sup>2,\*</sup>

<sup>1</sup> Singapore Membrane Technology Centre, Nanyang Environment and Water Research Institute, Nanyang Technological University, Singapore 637141 Singapore; chongyang.chuah@ntu.edu.sg (C.Y.C.)

<sup>2</sup> Department of Chemical and Biomolecular Engineering (BK21 four), Korea Advanced Institute of Science and Technology, Daejeon 34141, Korea

\* Correspondence: thbae@kaist.ac.kr (T-H.B.)

## SUMMARY

**Number of pages:** 8

**Number of Figures:** 4

**Number of Tables:** 6

**Table S1.** Fitting parameters for O<sub>2</sub> and N<sub>2</sub> adsorptions for ETS-10, PS-MFI and SAPO-34 at 25 °C.

| Sample  | gas            | $q_{sat}$ | $b$     | $R^2$ value |
|---------|----------------|-----------|---------|-------------|
| ETS-10  | O <sub>2</sub> | 2.272     | 0.08588 | 1           |
|         | N <sub>2</sub> | 2.272     | 0.2268  | 0.9961      |
| PS-MFI  | O <sub>2</sub> | 3.774     | 0.04305 | 1           |
|         | N <sub>2</sub> | 3.774     | 0.04603 | 0.9999      |
| SAPO-34 | O <sub>2</sub> | 5.470     | 0.03192 | 0.9967      |
|         | N <sub>2</sub> | 5.470     | 0.03722 | 0.9966      |

**Table S2.** Fitting parameters for O<sub>2</sub> and N<sub>2</sub> adsorptions for ETS-10, PS-MFI and SAPO-34 at 35 °C.

| Sample  | gas            | $q_{sat}$ | $b$     | $R^2$ value |
|---------|----------------|-----------|---------|-------------|
| ETS-10  | O <sub>2</sub> | 2.241     | 0.07729 | 1           |
|         | N <sub>2</sub> | 2.241     | 0.1936  | 0.9991      |
| PS-MFI  | O <sub>2</sub> | 3.845     | 0.03399 | 0.9995      |
|         | N <sub>2</sub> | 3.845     | 0.03631 | 0.9999      |
| SAPO-34 | O <sub>2</sub> | 5.333     | 0.02703 | 0.9979      |
|         | N <sub>2</sub> | 5.333     | 0.03108 | 0.9978      |

**Table S3.** Porosity properties of CMSM and mixed-matrix CMSMs.

| Membrane       | Average micropore size (nm) | Micropore volume (cc) | Micropore surface area (m <sup>2</sup> /g) |
|----------------|-----------------------------|-----------------------|--------------------------------------------|
| Matrimid® 5218 | 0.897                       | 0.191                 | 519                                        |
| 30 wt% ETS-10  | 0.547                       | 0.209                 | 556                                        |
| 30 wt% PS-MFI  | 0.673                       | 0.241                 | 643                                        |
| 30 wt% SAPO-34 | 0.701                       | 0.260                 | 692                                        |

**Table S4.** Solubility and diffusivity of O<sub>2</sub> and N<sub>2</sub> of CMSM and mixed-matrix CMSMs at 35 °C under the feed pressure of 1 bar (0.21 bar for O<sub>2</sub> and 0.79 bar for N<sub>2</sub>).

| Membrane       | Density (g/cm <sup>3</sup> ) | O <sub>2</sub> solubility (mol/m <sup>3</sup> -bar) | N <sub>2</sub> solubility (mol/m <sup>3</sup> -bar) | O <sub>2</sub> diffusivity (m <sup>2</sup> /s) | N <sub>2</sub> diffusivity (m <sup>2</sup> /s) |
|----------------|------------------------------|-----------------------------------------------------|-----------------------------------------------------|------------------------------------------------|------------------------------------------------|
| Matrimid® 5218 | 1.288                        | 143                                                 | 86                                                  | 2.65 × 10 <sup>-13</sup>                       | 8.00 × 10 <sup>-14</sup>                       |
| 30 wt% ETS-10  | 1.491                        | 152                                                 | 88                                                  | 7.07 × 10 <sup>-12</sup>                       | 3.11 × 10 <sup>-12</sup>                       |
| 30 wt% PS-MFI  | 1.439                        | 200                                                 | 156                                                 | 1.76 × 10 <sup>-11</sup>                       | 5.08 × 10 <sup>-12</sup>                       |
| 30 wt% SAPO-34 | 1.478                        | 137                                                 | 117                                                 | 9.76 × 10 <sup>-12</sup>                       | 2.88 × 10 <sup>-12</sup>                       |

**Table S5.** Performance of pure CMSMs that have been reported in the literature for O<sub>2</sub>/N<sub>2</sub> separation.

| Membrane             | Density<br>(g/cm <sup>3</sup> ) | O <sub>2</sub><br>solubility<br>(mol/m <sup>3</sup> -<br>bar) | N <sub>2</sub><br>solubility<br>(mol/m <sup>3</sup> -<br>bar) | O <sub>2</sub><br>diffusivity<br>(m <sup>2</sup> /s) | N <sub>2</sub><br>diffusivity<br>(m <sup>2</sup> /s) |
|----------------------|---------------------------------|---------------------------------------------------------------|---------------------------------------------------------------|------------------------------------------------------|------------------------------------------------------|
| BTPA-ODA             | 550 °C,<br>Argon                | 25 °C,<br>pure gas                                            | 500                                                           | 10.4                                                 | [1]                                                  |
| Kapton               | 550 °C,<br>vacuum               | 25 °C,<br>pure gas                                            | 45                                                            | 4.4                                                  | [2]                                                  |
| Kapton-1             | 600 °C,<br>vacuum               | 35 °C,<br>pure gas                                            | 383                                                           | 4.7                                                  | [3]                                                  |
| Matrimid             | 550 °C,<br>Argon                | 35 °C,<br>mixed gas<br>(21/79)                                | 5                                                             | 5.5                                                  | This work                                            |
| Matrimid-1           | 475 °C,<br>vacuum               | 25 °C,<br>pure gas                                            | 4                                                             | 4.5                                                  | [2]                                                  |
| Matrimid-2           | 550 °C,<br>vacuum               | 35 °C, 10<br>atm, pure<br>gas                                 | 280                                                           | 4.8                                                  | [4]                                                  |
| Br-Matrimid-2        | 550 °C,<br>vacuum               | 35 °C, 10<br>atm, pure<br>gas                                 | 850                                                           | 5.1                                                  | [4]                                                  |
| ODPA-ODA             | 650 °C                          | 50 °C,<br>pure gas                                            | 70.3                                                          | 6.0                                                  | [5]                                                  |
| ODPA-ODA-1           | 650 °C                          | 50 °C,<br>mixed gas<br>(21:79)                                | 33.2                                                          | 5.1                                                  | [5]                                                  |
| P84                  | 600 °C,<br>Nitrogen             | Pure gas                                                      | 72                                                            | 9.3                                                  | [6]                                                  |
| PEI                  | 550 °C,<br>vacuum               | 25 °C,<br>pure gas                                            | 19                                                            | 2.1                                                  | [7]                                                  |
| PEI-1                | 500 °C,<br>vacuum               | 26 °C,<br>pure gas                                            | 12                                                            | 3.9                                                  | [8]                                                  |
| Polypyrrole          | 500 °C,<br>Nitrogen             | 35 °C,<br>pure gas                                            | 815                                                           | 8.2                                                  | [9]                                                  |
| Poly(amino<br>imide) | 150 °C,<br>Nitrogen             | 35 °C,<br>pure gas                                            | 1                                                             | 6.1                                                  | [9]                                                  |
| PPO-2                | 650 °C,<br>vacuum               | 25 °C,<br>pure gas                                            | 55                                                            | 11.4                                                 | [10]                                                 |
| TMSPPPO80            | 650 °C,<br>vacuum               | 25 °C,<br>pure gas                                            | 125                                                           | 10                                                   | [10]                                                 |

**Note:** BTDA: Benzophenone tetracarboxylic dianhydride; ODA = 4,4'-oxydianiline; PPO = poly(p-phenylene oxide); TMS = chlorotrimethylsilane

**Table S6.** Performance of mixed-matrix CMSMs that have been reported in the literature for O<sub>2</sub>/N<sub>2</sub> separation.

| CMSM                         | Loading (wt%) | Measurement condition    | O <sub>2</sub> permeability (barrer) | O <sub>2</sub> /N <sub>2</sub> selectivity | $F_{index}$ | Ref.      |
|------------------------------|---------------|--------------------------|--------------------------------------|--------------------------------------------|-------------|-----------|
| ETS-10 (Matrimid)            | 30            | 35 °C, mixed gas (21/79) | 141                                  | 3.9                                        | 1.40        | This work |
| PS-MFI (Matrimid)            | 30            | 35 °C, mixed gas (21/79) | 465                                  | 4.5                                        | 3.35        | This work |
| SAPO-34 (Matrimid)           | 30            | 35 °C, mixed gas (21/79) | 170                                  | 4.0                                        | 1.68        | This work |
| zeolite 5A-100 nm (Matrimid) | 10            | 35 °C, mixed gas (21/79) | 77                                   | 4.0                                        | 0.83        | [11]      |
| zeolite 5A-100 nm (Matrimid) | 20            | 35 °C, mixed gas (21/79) | 168                                  | 3.7                                        | 1.17        | [11]      |
| zeolite 5A-1 µm (Matrimid)   | 10            | 35 °C, mixed gas (21/79) | 98                                   | 3.9                                        | 1.35        | [11]      |
| zeolite 5A-1 µm (Matrimid)   | 20            | 35 °C, mixed gas (21/79) | 121                                  | 3.9                                        | 1.14        | [11]      |
| zeolite 5A (Matrimid)        | 10            | 35 °C, mixed gas (21/79) | 84                                   | 4.4                                        | 1.45        | [12]      |
| zeolite 5A (Matrimid)        | 20            | 35 °C, mixed gas (21/79) | 142                                  | 4.2                                        | 1.73        | [12]      |
| H-zeolite 5A (Matrimid)      | 10            | 35 °C, mixed gas (21/79) | 151                                  | 4.4                                        | 2.03        | [12]      |
| H-zeolite 5A (Matrimid)      | 20            | 35 °C, mixed gas (21/79) | 185                                  | 4.0                                        | 1.64        | [12]      |
| ZSM-5 (ODPA-ODA)             | 0.5           | 50 °C, pure gas          | 13                                   | 4.2                                        | -3.74       | [5]       |
| ZSM-5 (ODPA-ODA)             | 0.5           | 50 °C, mixed gas (21/79) | 4.2                                  | 4.1                                        | -5.00       | [5]       |

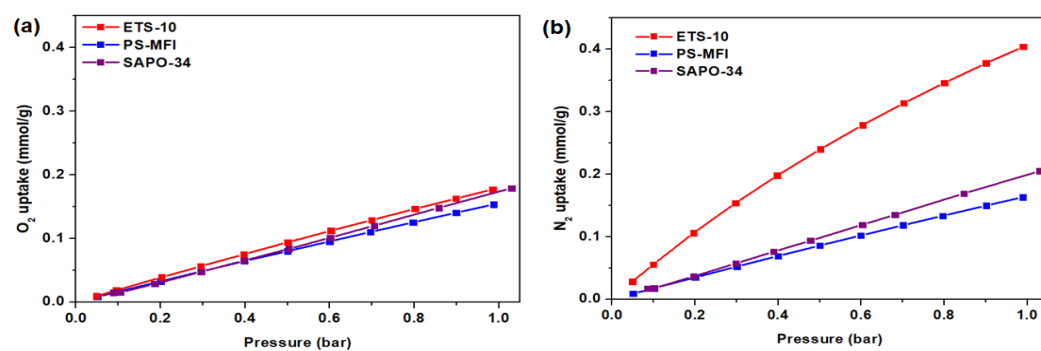

Figure S1. (a, b) O<sub>2</sub> and N<sub>2</sub> adsorption of ETS-10, PS-MFI and SAPO-34 fillers at 25 °C

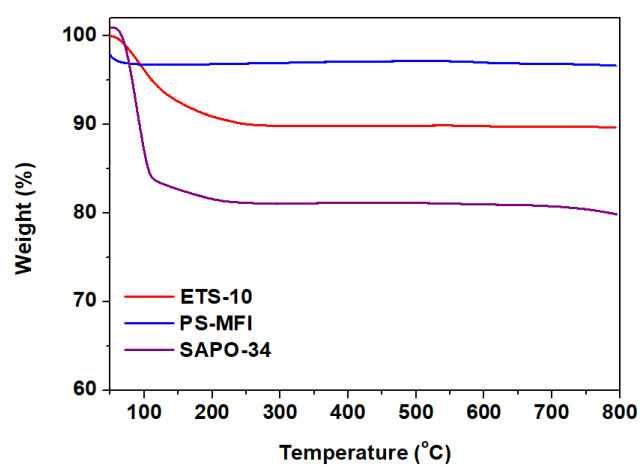

Figure S2. TGA analysis of ETS-10, PS-MFI and SAPO-34 fillers.

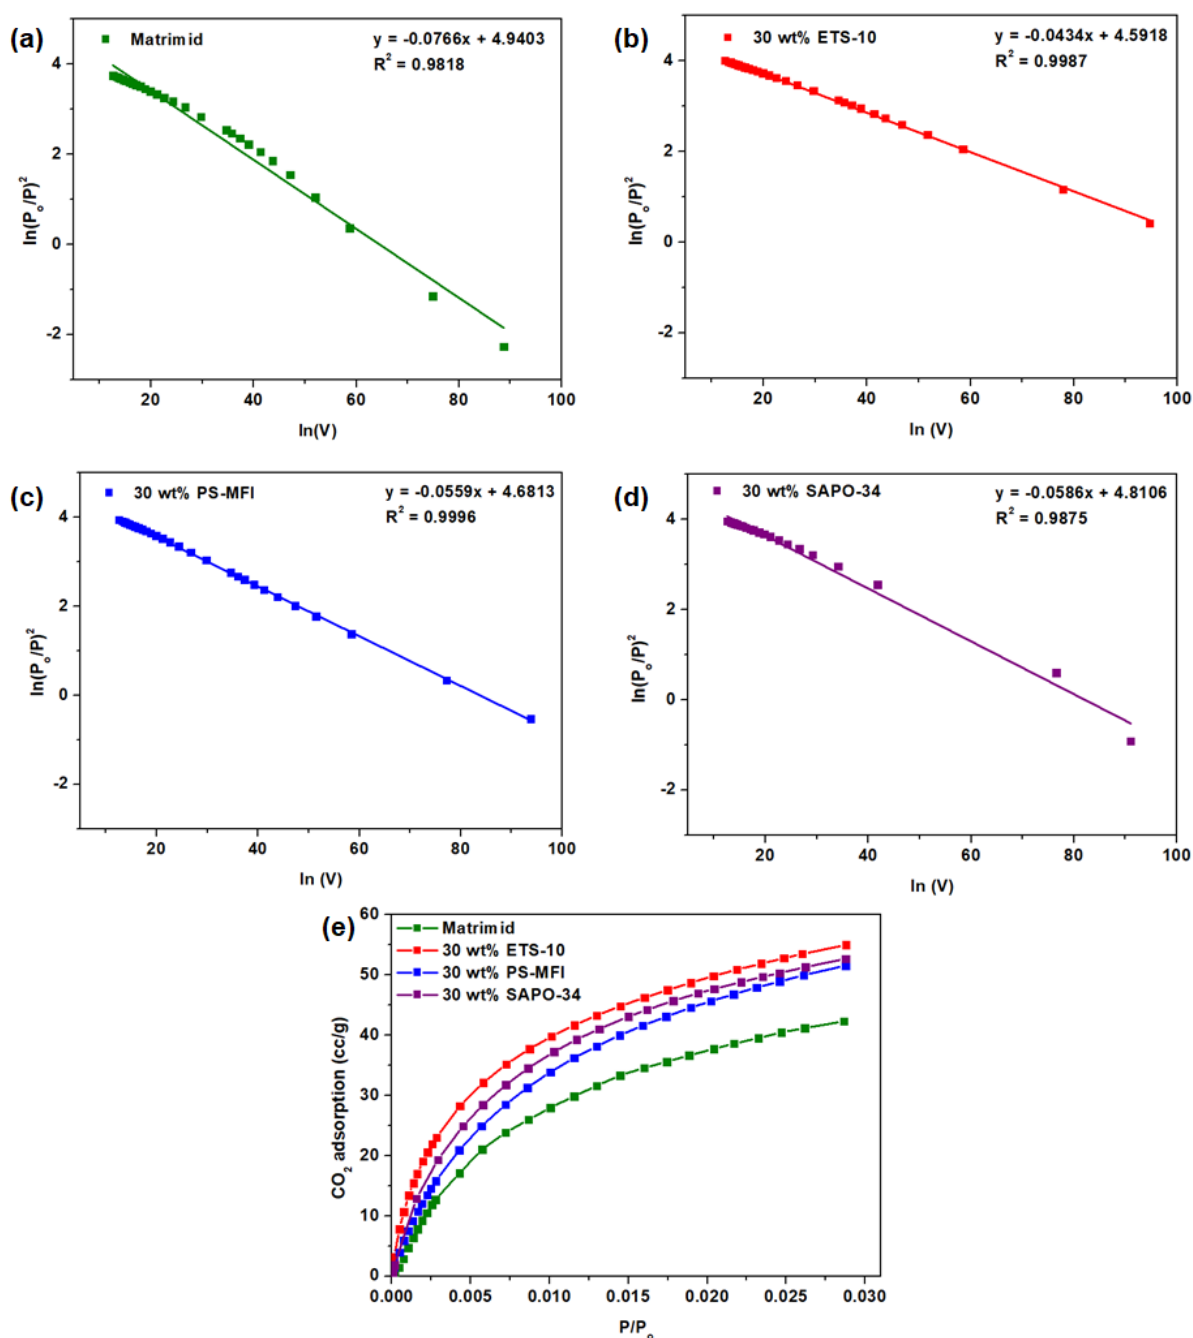

**Figure S3** Dubinin-Radushkevich (DR) plot for CMSMs and mixed-matrix CMSMs: (a) Matrimid, (b) 30 wt% ETS-10, (c) 30 wt% PS-MFI, and (d) 30 wt% SAPO-34; (e) CO<sub>2</sub> adsorption of CMSMs and mixed-matrix CMSMs at 0 °C. The saturation pressure of CO<sub>2</sub> (denoted as  $P_0$ ) is set at 26,141 torr

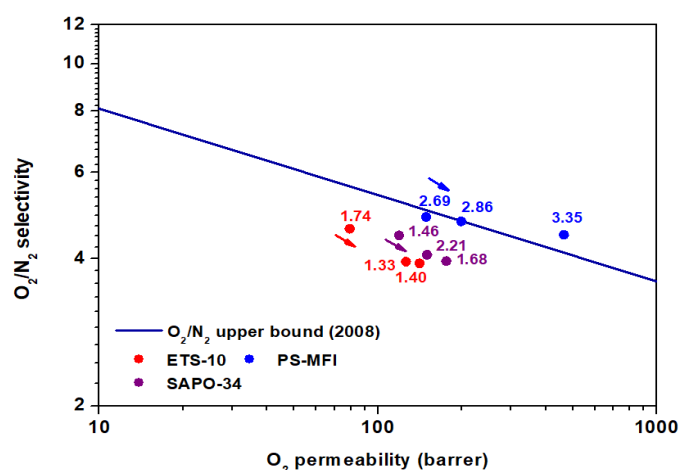

**Figure S4** Performance of mixed-matrix CMSMs with  $F_{index}$  values indicated. The  $F_{index}$  values can be obtained from Table 2, based on calculations from equation (5)

## References

1. Y.K. Kim, H.B. Park, Y.M. Lee, Carbon molecular sieve membranes derived from thermally labile polymer containing blend polymers and their gas separation properties, *J. Membr. Sci.*, 243 (2004) 9-17.
2. A. Fuertes, D. Nevskaya, T. Centeno, Carbon composite membranes from Matrimid® and Kapton® polyimides for gas separation, *Micropor. Mesopor. Mater.*, 33 (1999) 115-125.
3. H. Suda, K. Haraya, Gas permeation through micropores of carbon molecular sieve membranes derived from Kapton polyimide, *J. Phys. Chem. B*, 101 (1997) 3988-3994.
4. Y. Xiao, Y. Dai, T.-S. Chung, M.D. Guiver, Effects of brominating Matrimid polyimide on the physical and gas transport properties of derived carbon membranes, *Macromolecules*, 38 (2005) 10042-10049.
5. B. Zhang, Y. Wu, Y. Lu, T. Wang, X. Jian, J. Qiu, Preparation and characterization of carbon and carbon/zeolite membranes from ODPA-ODA type polyetherimide, *J. Membr. Sci.*, 474 (2015) 114-121.
6. J. Barsema, J. Balster, V. Jordan, N. Van der Vegt, M. Wessling, Functionalized carbon molecular sieve membranes containing Ag-nanoclusters, *J. Membr. Sci.*, 219 (2003) 47-57.
7. A.K. Itta, H.-H. Tseng, M.-Y. Wey, Effect of dry/wet-phase inversion method on fabricating polyetherimide-derived CMS membrane for  $H_2/N_2$  separation, *Int. J. Hydrog. Energy*, 35 (2010) 1650-1658.
8. P.S. Rao, M.-Y. Wey, H.-H. Tseng, I.A. Kumar, T.-H. Weng, A comparison of carbon/nanotube molecular sieve membranes with polymer blend carbon molecular sieve membranes for the gas permeation application, *Micropor. Mesopor. Mater.*, 113 (2008) 499-510.
9. H. Kita, M. Yoshino, K. Tanaka, K.-i. Okamoto, Gas permselectivity of carbonized polypyrrolone membrane, *Chem. Commun.*, (1997) 1051-1052.
10. M. Yoshimune, I. Fujiwara, K. Haraya, Carbon molecular sieve membranes derived from trimethylsilyl substituted poly(phenylene oxide) for gas separation, *Carbon*, 45 (2007) 553-560.
11. W. Li, C.Y. Chuah, S. Kwon, K. Goh, R. Wang, K. Na, T.-H. Bae, Nanosizing zeolite 5A fillers in mixed-matrix carbon molecular sieve membranes to improve gas separation performance, *Chem. Eng. J. Adv.*, 2 (2020) 100016.
12. W. Li, C.Y. Chuah, T.-H. Bae, Hierarchical 5A Zeolite-Containing Carbon Molecular Sieve Membranes for  $O_2/N_2$  Separation, *Membr. J.*, 30 (2020) 260-268.
